# Supplementary material for: Transgenic Overexpression of Aryl Hydrocarbon Receptor Repressor (AhRR) and AhR-Mediated Induction of CYP1A1, Cytokines, and Acute Toxicity
Source: PubMed Central journal article supplement (PMC4937866; doi:10.1289/ehp.1510194), 2016-02-05
Supplement: ehp.1510194.s001.acco.pdf [file ehp.1510194.s001.acco.pdf]

**Note to readers with disabilities:** *EHP* strives to ensure that all journal content is accessible to all readers. However, some figures and Supplemental Material published in *EHP* articles may not conform to [508 standards](#) due to the complexity of the information being presented. If you need assistance accessing journal content, please contact [ehp508@niehs.nih.gov](mailto:ehp508@niehs.nih.gov). Our staff will work with you to assess and meet your accessibility needs within 3 working days.

## **Supplemental Material**

### **Transgenic Overexpression of Aryl Hydrocarbon Receptor Repressor (AhRR) and AhR-Mediated Induction of CYP1A1, Cytokines, and Acute Toxicity**

Christoph F.A. Vogel, W.L. William Chang, Sarah Kado, Kelly McCulloh, Helena Vogel, Dalei Wu, Thomas Haarmann-Stemmann, GuoXiang Yang, Patrick S.C. Leung, Fumio Matsumura, and M. Eric Gershwin

#### **Table of Contents**

**Supplemental Material, Table S1.** Primer used to amplify mRNAs via quantitative real-time PCR encoding mouse rps13 as housekeeping gene, CYP1A1, AhRR, cytokines, and COX-2 based on published GenBank sequences for mouse.

**Supplemental Material, Table S2.** AhR-mediated induction of CYP1A1, cytokines, TNF $\alpha$ , and COX-2 in WT and AhRR Tg male mice.

**Supplemental Material, Figure S1.** H&E staining of various tissues from wt and AhRR Tg mice. At necropsy liver, lung, inguinal lymph nodes with surrounding white adipose tissue, thymus and spleen from wt and AhRR Tg mice were fixed in 10% formalin and then paraffin-embedded using standard histology protocols. Tissue sections represent replicates from four mice in each group control wt and AhRR Tg mice. Five- $\mu$ m sections were cut and stained with H&E as described previously (Wu et al. 2012).

**Supplemental Material, Figure S2.** Expression of CXCL chemokines, cytokines and COX-2 in epididymal adipose tissue of AhR null mice (AhR $^{-/-}$ ). (A) Expression of CXCL1, CXCL2, CXCL3, CXCL5, CXCL7, and CXCL14 and (B) IL-1 $\beta$ , IL-6, IL-10, IL-22, TNF $\alpha$ , and COX-2 in adipose tissue of AhR $^{-/-}$  mice in response to TCDD. Male AhR $^{-/-}$  mice were injected i.p. with a single dose of 20  $\mu$ g/kg TCDD for 24h. Control

animals received the solvent vehicle. Total RNA from tissues of six mice from each group was subjected to qPCR analysis as described under Materials and Methods. Data are presented as mean  $\pm$  SD. ns, not significant by two-tailed Student's t-test or Bonferroni's test.

**Supplemental Material, Figure S3. Expression of AhRR, CYP1A1, and cytokines in female mice in response to TCDD.** Expression of AhRR, CYP1A1, CXCL chemokines and cytokines in spleen and adipose tissue of female C57BL/6 wt and female AhRR Tg mice in response to TCDD. Female mice were injected i.p. with a single dose of 20  $\mu$ g/kg TCDD for 24h. Control animals received the solvent vehicle. Total RNA from tissues of six mice from each group was subjected to qPCR analysis as described under Materials and methods. The values are given as relative units and presented as mean  $\pm$  SD.

\*Significantly different from female wt control,  $p < 0.05$ ; \*\*Significantly different from female wt TCDD,  $p < 0.05$ . <sup>a</sup>Significantly different from male wt TCDD,  $p < 0.05$ ;

<sup>b</sup>Significantly different from male AhRR Tg TCDD,  $p < 0.05$ , by two-tailed Student's *t*-test or Bonferroni's test.

## Reference

**Supplemental Material, Table S1.** Primer used to amplify mRNAs via quantitative real-time PCR encoding mouse rps13 as housekeeping gene, CYP1A1, AhRR, cytokines, and COX-2 based on published GenBank sequences for mouse.

| <b><i>Gene</i></b>            | <b>Forward primer (5'–3')</b> | <b>Reverse primer (5'–3')</b> |
|-------------------------------|-------------------------------|-------------------------------|
| <i>AhRR</i>                   | tggacaagctttctgtcctg          | cgaagccattgagagactcc          |
| <i>COX-2</i>                  | ttgttgagtcattcaccaga          | cagtattgaggagaacagat          |
| <i>CXCL1</i>                  | cttgaaggtgttgccctca           | tggggacaccttttagcatc          |
| <i>CXCL2</i>                  | aagtttgccctgaccctgaa          | aggcacatcaggtacgatcc          |
| <i>CXCL3</i>                  | caacgggtgtctggatgtgc          | agccaaggaataactgcctca         |
| <i>CXCL5</i>                  | gaaagctaagcggaatgcac          | gggacaatggtttccctttt          |
| <i>CXCL7</i>                  | gcgctgcagatgtacgaata          | aggaaaatggtttggcacag          |
| <i>CXCL10</i>                 | ggatggctgtcctagctctg          | ataacccttggaagatgg            |
| <i>CXCL14</i>                 | ctccaggccagttgagagac          | ctggaagcctttcacacaca          |
| <i>CYP1A1</i>                 | ggccactttgacccttaca           | caggtaacggaggacaggaa          |
| <i>IL-1<math>\beta</math></i> | gcccacctctgtgactcat           | aggccacaggtattttgtcg          |
| <i>IL-6</i>                   | ccggagaggagacttcacag          | ggaaattgggtaggaagga           |
| <i>IL-10</i>                  | ccaagccttatcggaaatga          | ttttcacaggggagaaatcg          |
| <i>IL-22</i>                  | tttctgaccaaactcagca           | tctggatgttctggtcgtca          |
| <i>TNF<math>\alpha</math></i> | agccccagctctgtatcett          | ctccctttgcagaactcagg          |
| <i>Rps13</i>                  | gtccgaaagcaccttgagag          | agcagaggctgtggatgact          |

**Supplemental Material, Table S2.** AhR-mediated induction of CYP1A1, cytokines, TNF $\alpha$ , and COX-2 in WT and AhRR Tg male mice.

| <i>Gene</i>                   | ADIPOSE                     |                        |                             | KIDNEY                      |                        |                             | LIVER                       |                        |                             |
|-------------------------------|-----------------------------|------------------------|-----------------------------|-----------------------------|------------------------|-----------------------------|-----------------------------|------------------------|-----------------------------|
|                               | AhRR Tg ctrl<br>vs. wt ctrl | wt TCDD<br>vs. wt ctrl | AhRR Tg TCDD<br>vs. wt TCDD | AhRR Tg ctrl<br>vs. wt ctrl | wt TCDD<br>vs. wt ctrl | AhRR Tg TCDD<br>vs. wt TCDD | AhRR Tg ctrl<br>vs. wt ctrl | wt TCDD<br>vs. wt ctrl | AhRR Tg TCDD<br>vs. wt TCDD |
| <i>CYP1A1</i>                 | —                           | ↑                      | ↓                           | ↑                           | ↑                      | ↓                           | —                           | ↑                      | ↑↓                          |
| <i>CXCL1</i>                  | —                           | ↑                      | ↓                           | —                           | ↑                      | —                           | —                           | ↑                      | ↓                           |
| <i>CXCL2</i>                  | —                           | ↑                      | ↓                           | —                           | ↑                      | ↓                           | —                           | ↑                      | ↓                           |
| <i>CXCL3</i>                  | —                           | ↑                      | ↓                           | —                           | ↑                      | ↓                           | —                           | ↑                      | ↓                           |
| <i>CXCL5</i>                  | —                           | ↑                      | ↑↓                          | —                           | ↑                      | ↓                           | —                           | ↑                      | ↓                           |
| <i>CXCL7</i>                  | —                           | ↑                      | ↑↓                          | —                           | ↑                      | ↑↓                          | —                           | —                      | —                           |
| <i>CXCL14</i>                 | —                           | ↑                      | ↑↓                          | —                           | ↓                      | ↑↓                          | —                           | —                      | —                           |
| <i>IL-1<math>\beta</math></i> | —                           | ↑                      | ↓                           | —                           | ↑                      | ↓                           | —                           | ↑                      | ↓                           |
| <i>IL-6</i>                   | —                           | ↑                      | ↑↓                          | —                           | ↑                      | ↑↓                          | —                           | —                      | —                           |
| <i>IL-10</i>                  | —                           | ↑                      | ↑↓                          | —                           | ↑                      | —                           | —                           | —                      | —                           |
| <i>IL-22</i>                  | —                           | —                      | —                           | —                           | ↑                      | —                           | —                           | —                      | —                           |
| <i>TNF<math>\alpha</math></i> | —                           | ↑                      | ↓                           | —                           | —                      | —                           | —                           | —                      | —                           |
| <i>COX-2</i>                  | —                           | ↑                      | ↓                           | —                           | ↑                      | ↓                           | —                           | ↑                      | ↓                           |

  

| <i>Gene</i>                   | LUNG                        |                        |                             | SPLEEN                      |                        |                             | THYMUS                      |                        |                             |
|-------------------------------|-----------------------------|------------------------|-----------------------------|-----------------------------|------------------------|-----------------------------|-----------------------------|------------------------|-----------------------------|
|                               | AhRR Tg ctrl<br>vs. wt ctrl | wt TCDD<br>vs. wt ctrl | AhRR Tg TCDD<br>vs. wt TCDD | AhRR Tg ctrl<br>vs. wt ctrl | wt TCDD<br>vs. wt ctrl | AhRR Tg TCDD<br>vs. wt TCDD | AhRR Tg ctrl<br>vs. wt ctrl | wt TCDD<br>vs. wt ctrl | AhRR Tg TCDD<br>vs. wt TCDD |
| <i>CYP1A1</i>                 | ↓                           | ↑                      | ↑↓                          | —                           | ↑                      | ↓                           | —                           | ↑                      | ↑↓                          |
| <i>CXCL1</i>                  | —                           | —                      | —                           | —                           | ↑                      | ↓                           | —                           | ↑                      | ↑↓                          |
| <i>CXCL2</i>                  | —                           | ↑                      | ↓                           | —                           | ↑                      | ↓                           | —                           | ↑                      | ↓                           |
| <i>CXCL3</i>                  | —                           | ↑                      | ↑↓                          | —                           | ↑                      | ↓                           | —                           | ↑                      | ↓                           |
| <i>CXCL5</i>                  | —                           | —                      | —                           | —                           | ↑                      | ↑↓                          | —                           | ↑                      | ↑↓                          |
| <i>CXCL7</i>                  | —                           | —                      | —                           | —                           | —                      | —                           | —                           | ↑                      | ↑↓                          |
| <i>CXCL14</i>                 | —                           | ↓                      | ↑↓                          | —                           | —                      | —                           | —                           | ↑                      | —                           |
| <i>IL-1<math>\beta</math></i> | —                           | ↑                      | ↓                           | —                           | ↑                      | ↓                           | —                           | ↑                      | ↓                           |
| <i>IL-6</i>                   | —                           | —                      | —                           | —                           | ↑                      | —                           | —                           | —                      | —                           |
| <i>IL-10</i>                  | —                           | —                      | —                           | —                           | ↑                      | ↑↓                          | —                           | ↑                      | ↑↓                          |
| <i>IL-22</i>                  | —                           | —                      | —                           | —                           | —                      | —                           | —                           | ↑                      | ↑↓                          |
| <i>TNF<math>\alpha</math></i> | —                           | —                      | —                           | —                           | —                      | —                           | —                           | —                      | —                           |
| <i>COX-2</i>                  | —                           | ↑                      | ↓                           | —                           | ↑                      | ↓                           | —                           | ↑                      | ↑↓                          |

legend:

- not significantly different vs. wt ctrl
- ↑ significantly higher (AhRR Tg Ctrl vs. wt Ctrl); p < 0.05
- ↓ significantly lower (AhRR Tg Ctrl vs. wt Ctrl); p < 0.05
- ↑ significantly higher (wt TCDD vs. wt Ctrl); p < 0.05
- ↓ significantly lower (wt TCDD vs. wt Ctrl); p < 0.05
- ↓ significantly lower (AhRR Tg TCDD vs. wt TCDD); p < 0.05
- ↑↓ not significantly different (AhRR Tg TCDD vs. wt TCDD); p < 0.05

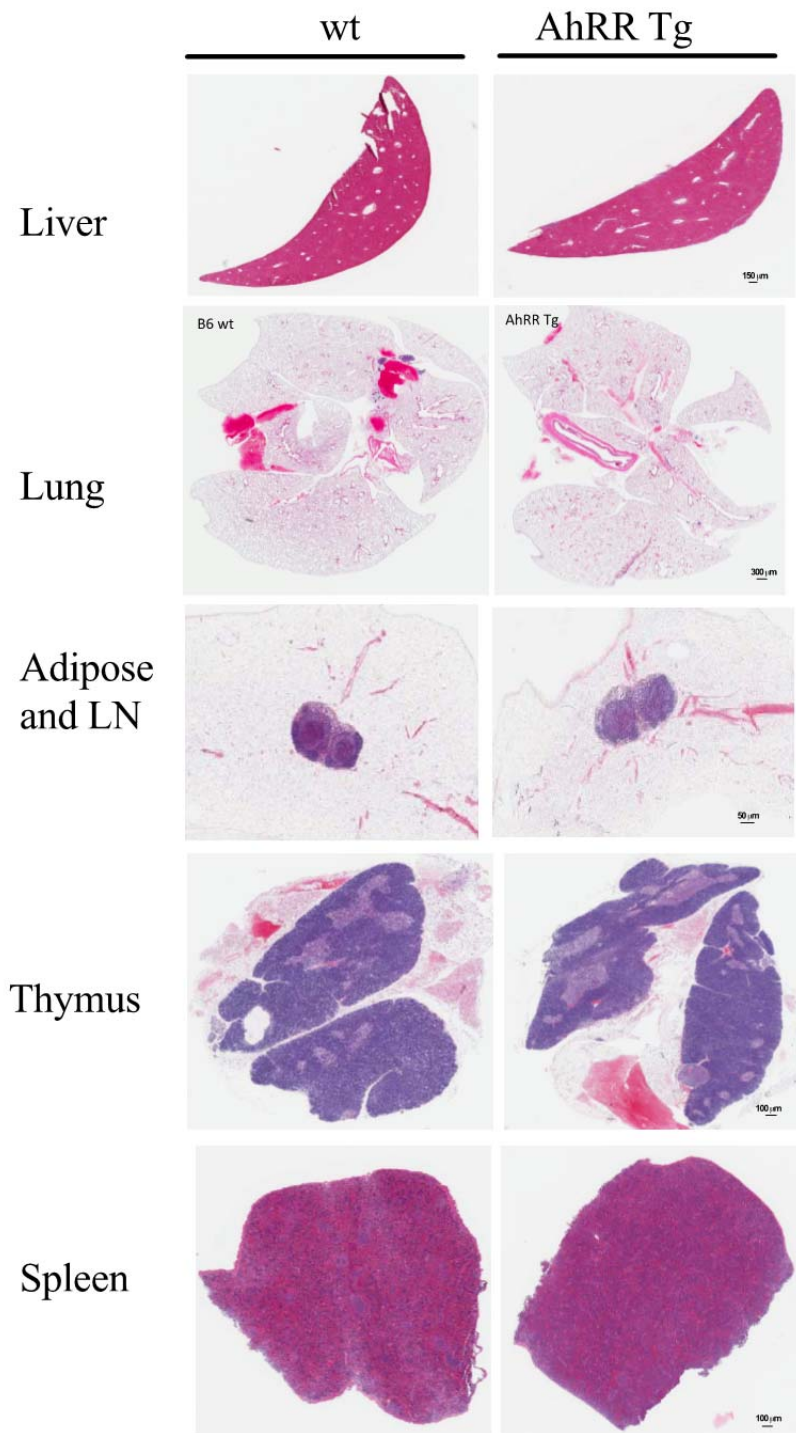

**Supplemental Material, Figure S1. H&E staining of various tissues from wt and AhRR Tg mice.** At necropsy liver, lung, inguinal lymph nodes with surrounding white adipose tissue, thymus and spleen from wt and AhRR Tg mice were fixed in 10% formalin and then paraffin-embedded using standard histology protocols. Tissue sections represent replicates from four mice in each group control wt and AhRR Tg mice. Five- $\mu$ m sections were cut and stained with H&E as described previously (Wu et al. 2012).

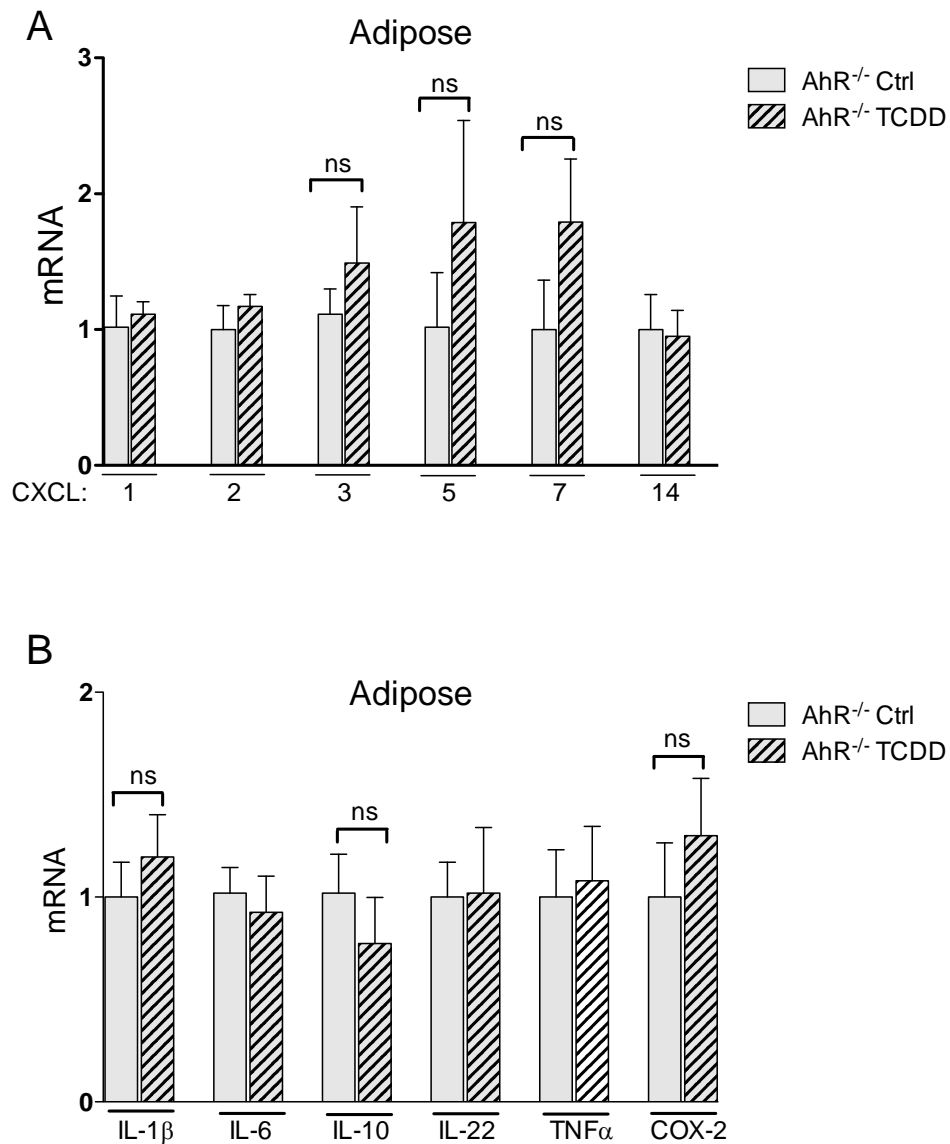

**Supplemental Material, Figure S2. Expression of CXCL chemokines, cytokines and COX-2 in epididymal adipose tissue of AhR null mice (AhR<sup>-/-</sup>).** (A) Expression of CXCL1, CXCL2, CXCL3, CXCL5, CXCL7, and CXCL14 and (B) IL-1 $\beta$ , IL-6, IL-10, IL-22, TNF $\alpha$ , and COX-2 in adipose tissue of AhR<sup>-/-</sup> mice in response to TCDD. Male AhR<sup>-/-</sup> mice were injected i.p. with a single dose of 20  $\mu$ g/kg TCDD for 24h. Control animals received the solvent vehicle. Total RNA from tissues of six mice from each group was subjected to qPCR analysis as described under Materials and Methods. Data are presented as mean  $\pm$  SD. ns, not significant by two-tailed Student's *t*-test or Bonferroni's test.

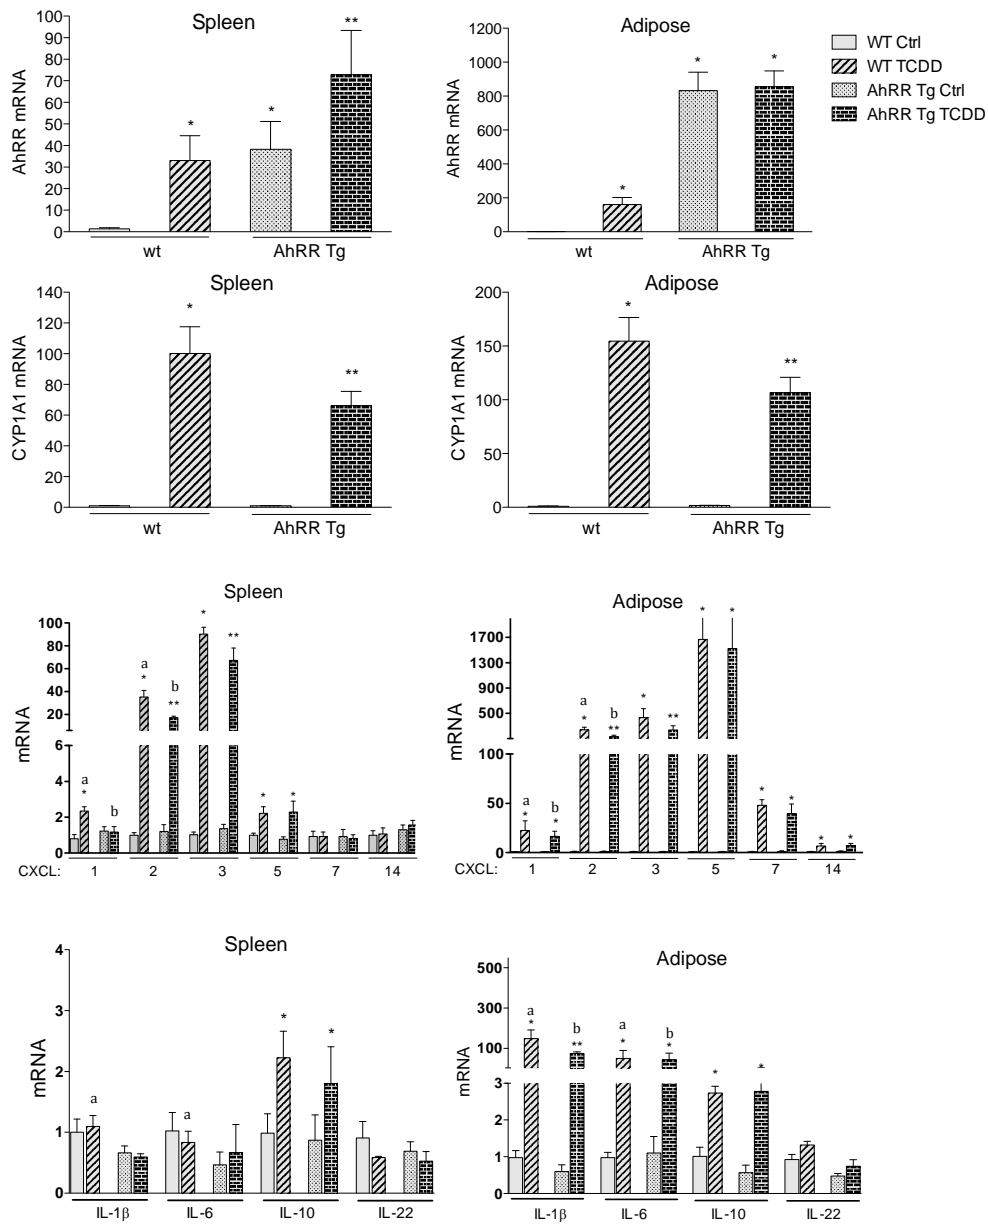

**Supplemental Material, Figure S3. Expression of AhRR, CYP1A1, and cytokines in female mice in response to TCDD.** Expression of AhRR, CYP1A1, CXCL chemokines and cytokines in spleen and adipose tissue of female C57BL/6 wt and female AhRR Tg mice in response to TCDD. Female mice were injected i.p. with a single dose of 20  $\mu\text{g}/\text{kg}$  TCDD for 24h. Control animals received the solvent vehicle. Total RNA from tissues of six mice from each group was subjected to qPCR analysis as described under Materials and methods. The values are given as relative units and presented as mean  $\pm$  SD. \*Significantly different from female wt control,  $p < 0.05$ ; \*\*Significantly different from female wt TCDD,  $p < 0.05$ . <sup>a</sup>Significantly different from male wt TCDD,  $p < 0.05$ ; <sup>b</sup>Significantly different from male AhRR Tg TCDD,  $p < 0.05$ , by two-tailed Student's  $t$ -test or Bonferroni's test.

## Reference

Wu D, Nishimura N, Kuo V, Fiehn O, Shahbaz S, Van Winkle L, et al. 2011. Activation of aryl hydrocarbon receptor induces vascular inflammation and promotes atherosclerosis in apolipoprotein E<sup>-/-</sup> mice. *Arterioscler Thromb Vasc Biol* 31: 1260-1267.
